# Supplementary material for: Checklist for Early Recognition and Treatment of Acute Illness (CERTAIN): evolution of a content management system for point-of-care clinical decision support
Source: PubMed Central journal article supplement (PMC5048402; doi:10.1186/s12911-016-0367-3), 2016-10-03

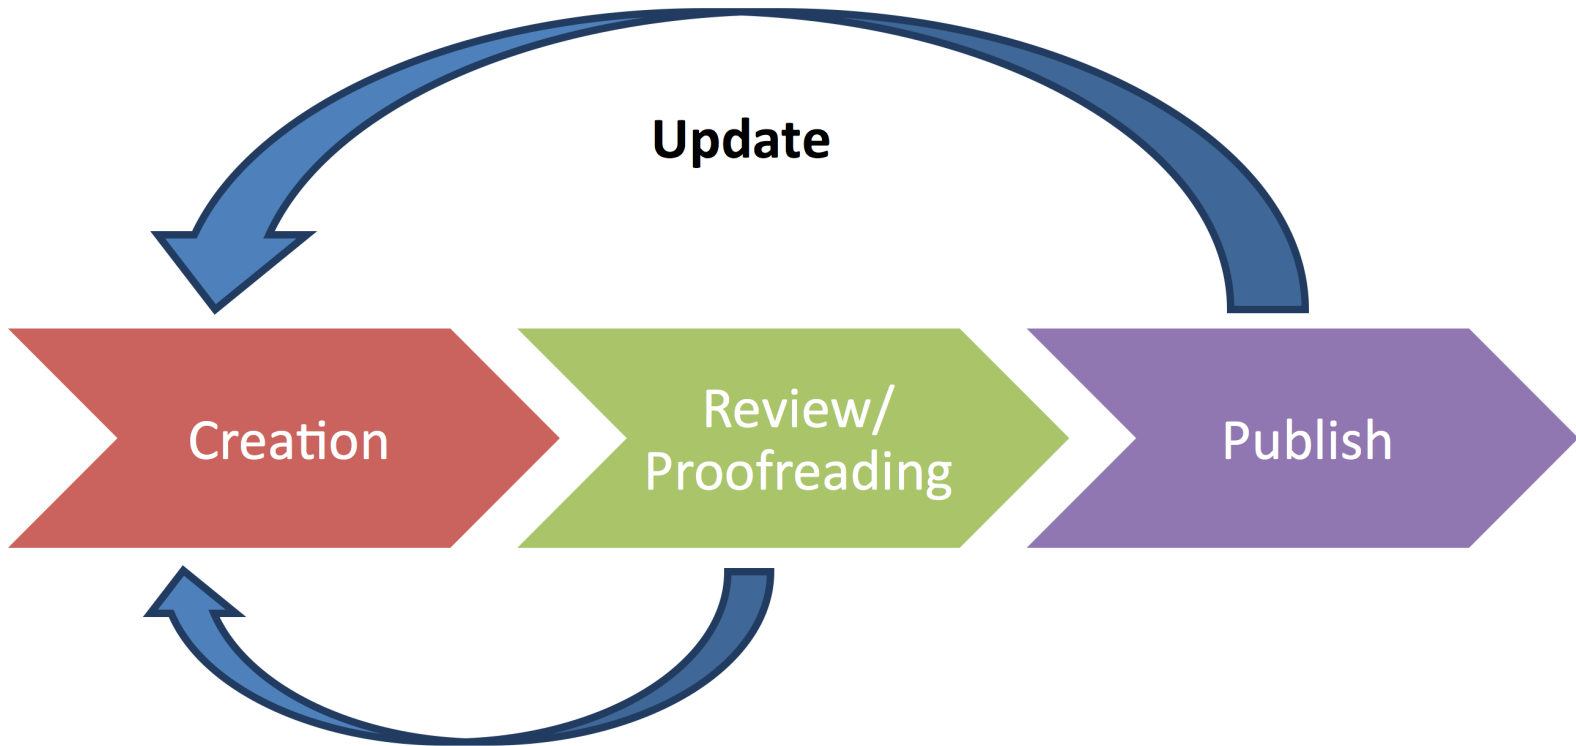

Supplement: 12911_2016_367_MOESM4_ESM.pdf [file 12911_2016_367_MOESM4_ESM.pdf]
