# Supplementary material for: Checklist for Early Recognition and Treatment of Acute Illness (CERTAIN): evolution of a content management system for point-of-care clinical decision support
Source: PubMed Central journal article supplement (PMC5048402; doi:10.1186/s12911-016-0367-3), 2016-10-03

New card  
or  
Annual review  
or  
User sends  
comment

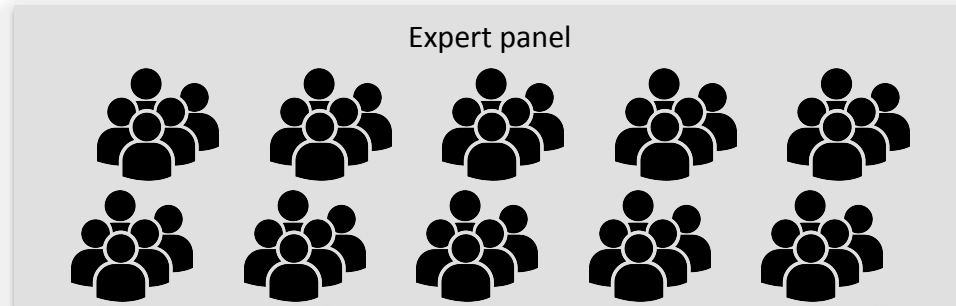

Content management panel

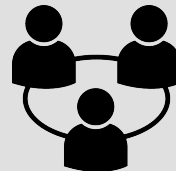

Content lead editor

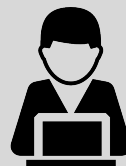

Author

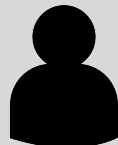

Reviewers

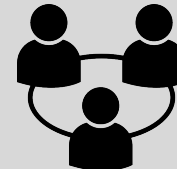

Supplement: 12911_2016_367_MOESM5_ESM.pdf [file 12911_2016_367_MOESM5_ESM.pdf]
